# Supplementary material for: Highly conductive and stretchable poly(dimethylsiloxane):poly(3,4-ethylenedioxythiophene):poly(styrene sulfonic acid) blends for organic interconnects
Source: Royal Society of Chemistry journal article supplement (doi:10.1039/c3ra46087h), 2013-11-13
Supplement: c3ra46087h.pdf [file c3ra46087h.pdf]

**Supporting Information for**

**Highly Conductive and Stretchable Poly(dimethylsiloxane):  
Poly(3,4-ethylenedioxythiophene):Poly(styrene sulfonic acid)  
Blends for Organic Interconnects**

Jin-Seo Noh\*

*Department of Nano-Physics, Gachon University, 1342 Seongnamdaero, Seongnam-si, Gyeonggi-do 461-701,  
Korea*

\*Author to whom correspondence should be addressed: Jin-Seo Noh: e-mail: jinseonoh@gachon.ac.kr, phone:  
+82 317505611

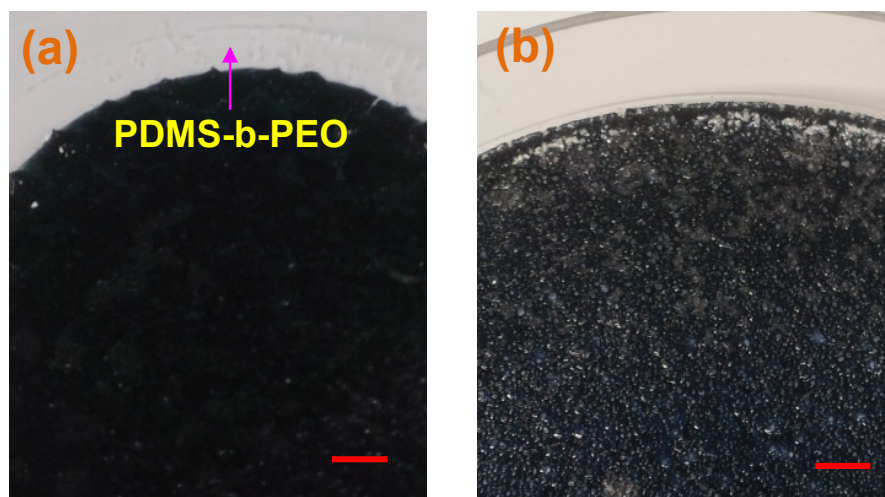

**Figure S1.** Photographs of polymer blend films consisting of (a) a 200% PEDOT:PSS, a 100% PDMS, and a 40% PDMS-b-PEO, and (b) a 300% PEDOT:PSS, a 100% PDMS, and a 30% PDMS-b-PEO, respectively. It is found from (a) that a PDMS-b-PEO phase is separated from the main blend film at this excess concentration of PDMS-b-PEO. (b) shows a higher concentration of PEDOT:PSS does not improve the film uniformity. Scale bars 5 mm.

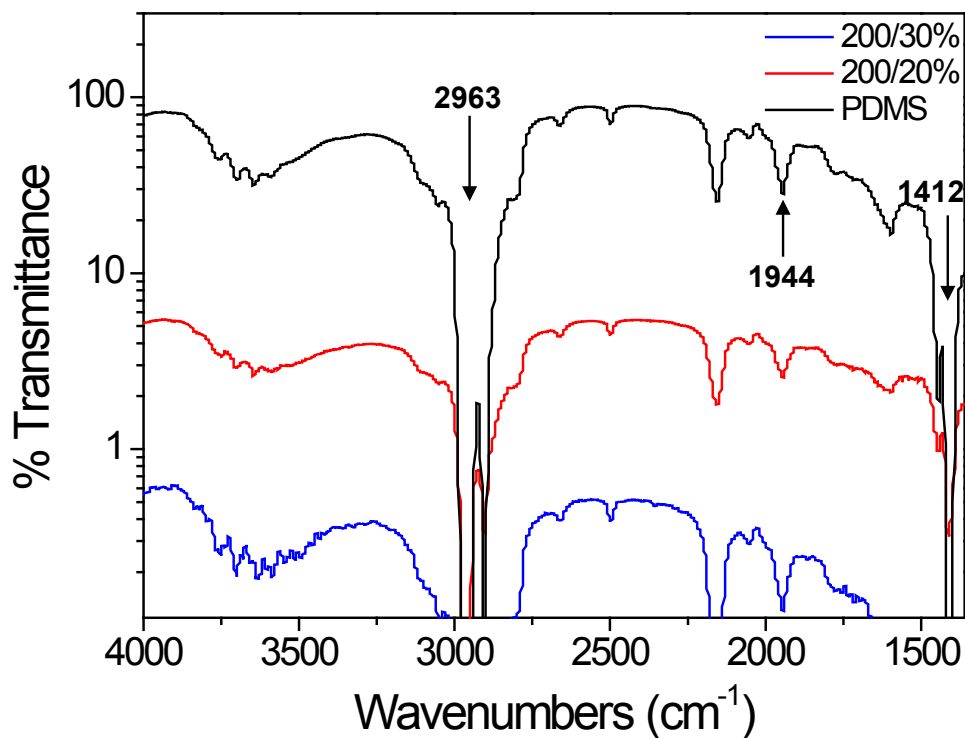

**Figure S2.** PEDOT:PSS:PDMS blend films show FT-IR profiles similar to that of a PDMS film, irrespective of the concentration of PDMS-b-PEO. This reflects that the blend films keep the main attributes of the PDMS film, thereby reinforcing their mechanical properties. The peaks at 2963 and 1412 cm<sup>-1</sup> correspond to CH stretching of CH<sub>3</sub> groups and CH<sub>3</sub> asymmetric deformation of Si-CH<sub>3</sub> bonds, respectively.

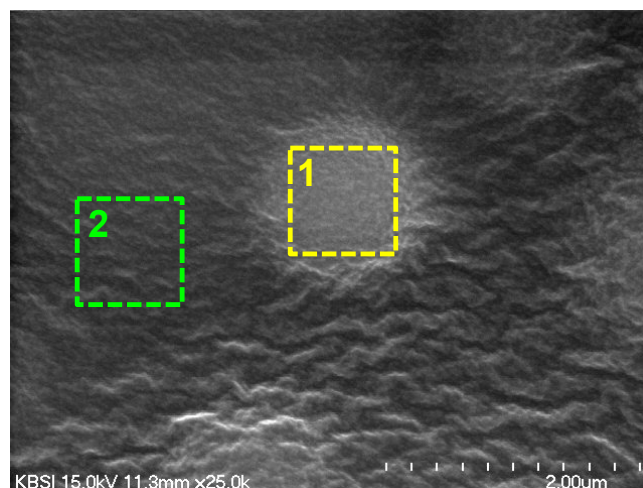

| Element | Atomic % (1) | Atomic % (2) |
|---------|--------------|--------------|
| C       | 63.22        | 69.76        |
| O       | 30.75        | 23.31        |
| Si      | 5.01         | 5.43         |
| S       | 1.02         | 1.51         |

**Figure S3.** SEM image taken from another location on the same sample as in Fig. 4. Nano- or micro-structures are very similar to those discussed in the main text, which are composed of hairy ball-like domains and ruffled sea surrounding them. Atomic fractions obtained from the two distinct areas also resemble those of Fig. 4.

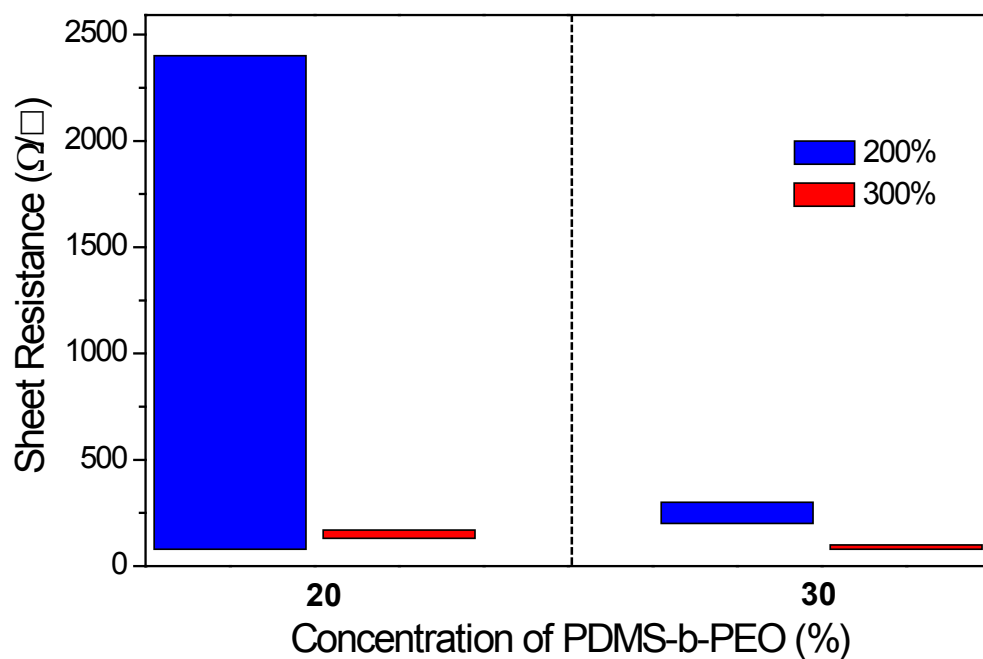

**Figure S4.** The sheet resistance of a polymer blend film is drastically reduced when the concentration of PEDOT:PSS increases. However, the increased PEDOT:PSS concentration is apt to weaken the mechanical property of the polymer blend as evidenced by Fig. 5(c), thus an optimal composition should be determined by a trade-off between electrical and mechanical properties.

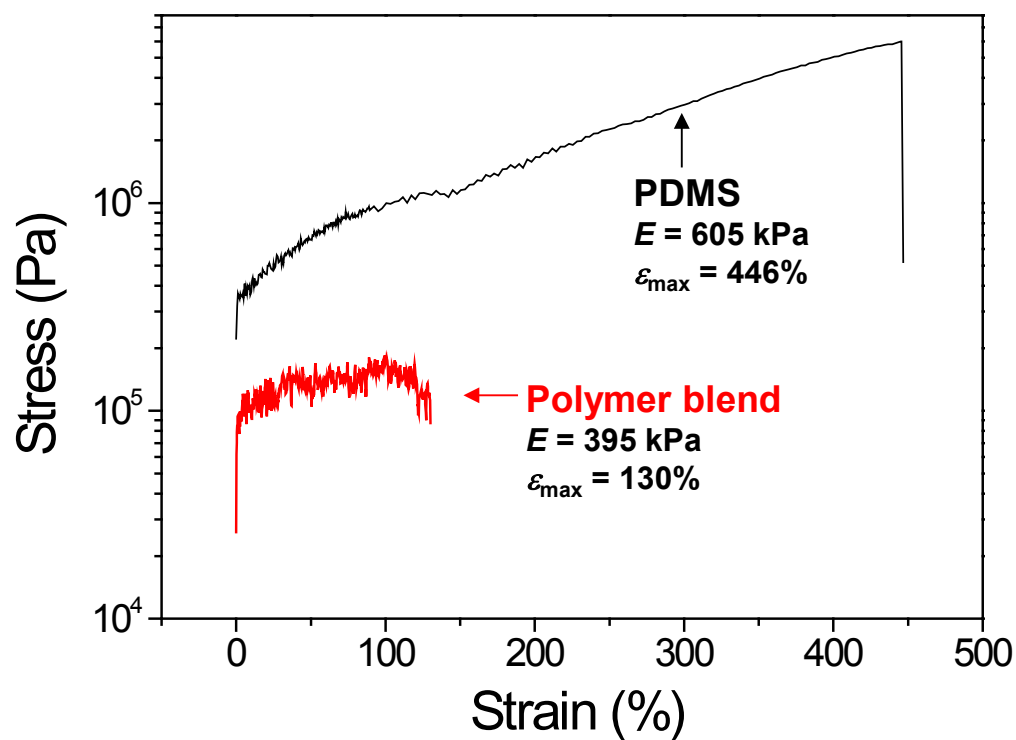

**Figure S5.** Tensile test results for a polymer blend film and a pure PDMS sheet. The composition of the blend film was same as that of a film with the largest rupturing strain ( $\sim 75\%$ ) in Fig. 5(c). Due to the incorporation of a large amount of PEDOT:PSS, which is mechanically weak, the mechanical properties of the blend film is deteriorated compared to pure PDMS sheet.

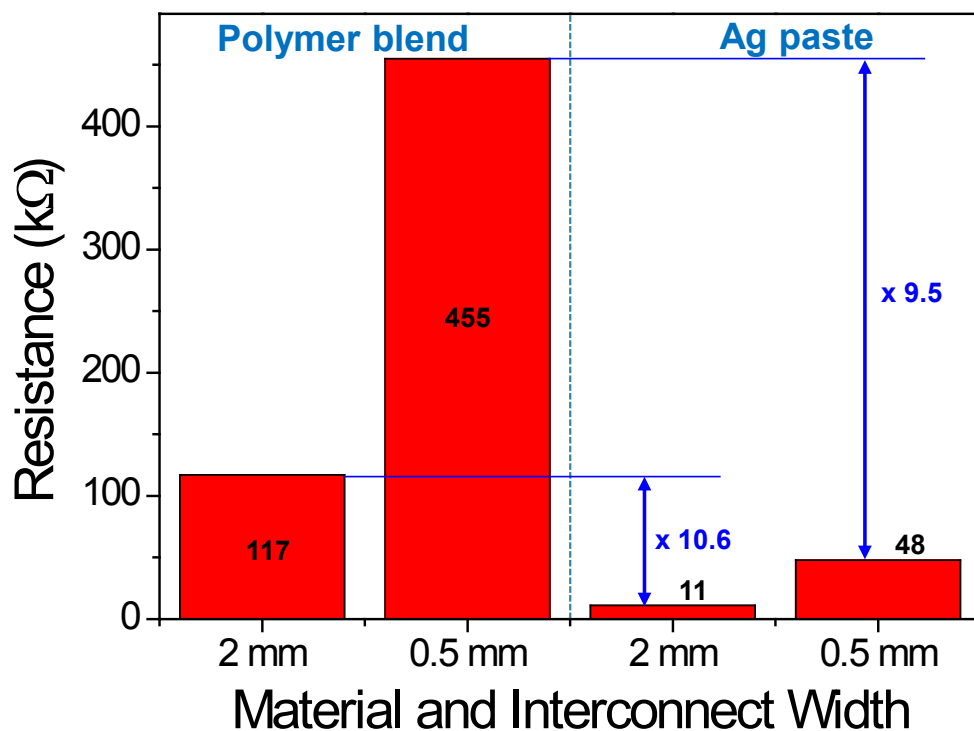

**Figure S6.** The resistance of a polymer blend interconnect appears to be about an order of magnitude higher than that of a control interconnect made of a Ag paste. This difference is originated from the conductivity difference of the two materials.
